# Supplementary material for: Differentiation of brain metastases from small and non-small lung cancers using apparent diffusion coefficient (ADC) maps
Source: PubMed Central journal article supplement (PMC8048287; doi:10.1186/s12880-021-00602-7), 2021-04-15
Supplement: 12880_2021_602_MOESM2_ESM.pdf [file 12880_2021_602_MOESM2_ESM.pdf]

# Diagnostic value of apparent diffusion coefficient maps for the differentiation of brain metastases from lung cancer

Sebastian Müller; Eya Khadhraoui; Nicole Neef; Marielle Ernst; Christian Riedel

## Supplementary material

**Supplementary Table 1 – Kruskal Wallis Test results of brain metastases. Multiple comparisons p values (2-tailed).**

|                   | <b>SCLC</b>       | <b>AC</b>       | <b>SCC</b>      | <b>Other</b>    | <b>Hemorrhage</b> |
|-------------------|-------------------|-----------------|-----------------|-----------------|-------------------|
|                   | rank sum 44       | rank sum 137    | rank sum 140    | rank sum 85     | rank sum 95       |
|                   | <i>p</i> -value   | <i>p</i> -value | <i>p</i> -value | <i>p</i> -value | <i>p</i> -value   |
| <b>SCLC</b>       |                   | <b>0.0001</b>   | <b>0.0001</b>   | 1.00            | 0.39              |
| <b>AC</b>         | <b>&lt;0.0001</b> |                 | p=1.00          | 0.96            | 0.89              |
| <b>SCC</b>        | <b>&lt;0.0001</b> | 1.00            |                 | 1.00            | 1.00              |
| <b>Other</b>      | 1.00              | 0.96            | 1.00            |                 | 1.00              |
| <b>Hemorrhage</b> | 0.39              | 0.89            | 1.00            | 1.00            |                   |

**Table legend:** SCLC small cell lung cancer, AC adenocarcinoma, SCC squamous cell carcinoma.
